# Supplementary material
Source: MDPI journal article supplement (https://www.mdpi.com/2076-3417/11/16/7567)
Supplement: s1 [file s1]

## Article

# How Poloxamer Addition in Hyaluronic-Acid-Decorated Biodegradable Microparticles Affects Polymer Degradation and Protein Release Kinetics

Teresa Silvestri <sup>1</sup>, Barbara Immirzi <sup>2</sup>, Giovanni Dal Poggetto <sup>2</sup>, Paola Di Donato <sup>3,4</sup>, Valentina Mollo <sup>5</sup>, Laura Mayol <sup>1,6,\*</sup> and Marco Biondi <sup>1,6</sup>

<sup>1</sup> Scuola di Medicina e Chirurgia, Università di Napoli Federico II, Via Domenico Montesano 49, 80131, Napoli, Italy; teresa.silvestri@unina.it (T.S.); mabiondi@unina.it (M.B.)

<sup>2</sup> Institute of Polymers, Composites and Biomaterials (IPCB), C/o Comprensorio Olivetti, Via Campi Flegrei 34, 80078 Pozzuoli, Italy; barbara.immirzi@ipcb.cnr.it (B.I.); giovanni.dalpoggetto@ipcb.cnr.it (G.D.P.)

<sup>3</sup> Department of Science and Technology, Centro Direzionale-Isola C4, Parthenope University of Naples, 80143 Napoli, Italy; paola.didonato@uniparthenope.it

<sup>4</sup> Institute of Biomolecular Chemistry, National Research Council of Italy, Via Campi Flegrei 34, 80078 Pozzuoli, Italy

<sup>5</sup> Italian Institute of Technology@CRIB Center for Advanced Biomaterials for Health Care, 80125 Napoli, Italy; Valentina.Mollo@iit.it

<sup>6</sup> Centro di Ricerca Interdipartimentale sui Biomateriali (CRIB), Università di Napoli Federico II, Piazzale Tecchio 80, 80125, Napoli, Italy

\* Correspondence: laumayol@unina.it

**Citation:** Silvestri, T.; Immirzi, B.; Poggetto, G.D.; Donato, P.D.; Mollo, V.; Mayol, L.; Biondi, M. How Poloxamer Addition in Hyaluronic-Acid-Decorated Biodegradable Microparticles Affects Polymer Degradation and Protein Release Kinetics. *Appl. Sci.* **2021**, *11*, 7567. <https://doi.org/10.3390/app11167567>

Academic Editor: David G. Calatayud

Received: 2 July 2021  
Accepted: 14 August 2021  
Published: 18 August 2021

**Publisher's Note:** MDPI stays neutral with regard to jurisdictional claims in published maps and institutional affiliations.

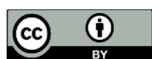

**Copyright:** © 2021 by the authors. Submitted for possible open access publication under the terms and conditions of the Creative Commons Attribution (CC BY) license (<http://creativecommons.org/licenses/by/4.0/>).

**Table S1.** Weight-average molecular weight (Mw), number-average molecular weight (Mn), intrinsic viscosity (IV) and weight fraction of peak1 and peak2 as determined by GPC.

| Entry | Sample     | Mw (Da) | Mn(Da) | IV     | %wt.peak 1 | %wt.peak 2 |
|-------|------------|---------|--------|--------|------------|------------|
| 1     | 20:100 7d  | 34266   | 15372  | 0.193  | 87         | 13         |
| 2     | 20:100 14d | 24741   | 7648   | 0.208  | 75         | 25         |
| 3     | 20:100 21d | 22545   | 8206   | 0.185  | 69         | 31         |
| 4     | 20:100 28d | 19953   | 6350   | 0.143  | 34         | 66         |
| 5     | 20:90 7d   | 31576   | 10592  | 0.206  | 78         | 22         |
| 6     | 20:90 14d  | 20305*  | 9269*  | 0.150  | 66         | 34         |
| 7     | 20:90 21d  | 21108   | 7759   | 0.152  | 83         | 17         |
| 8     | 20:90 28d  | 17035   | 8238   | 0.216  | 21         | 78         |
| 9     | 20:70 7d   | 27449   | 9922   | 0.178  | 78         | 22         |
| 10    | 20:70 14d  | 21027*  | 9245*  | 0.150* | 76         | 24         |
| 11    | 20:70 21d  | 22581   | 9032   | 0.126  | 82         | 18         |
| 12    | 20:70 28d  | 20213   | 7646   | 0.149  | 53         | 47         |
| 13    | 24:100 7d  | 31596   | 13596  | 0.207  | 85         | 15         |
| 14    | 24:100 14d | 23282   | 7861   | 0.206  | 78         | 22         |
| 15    | 24:100 21d | 20963   | 7403   | 0.156  | 73         | 27         |
| 16    | 24:100 28d | 15817   | 6160   | 0.125  | 51         | 49         |
| 17    | 24:90 7d   | 27233*  | 10883* | 0.201  | 74         | 26         |
| 18    | 24:90 14d  | 24703   | 8440   | 0.127  | 74         | 26         |
| 19    | 24:90 21d  | 11053   | 4141   | 0.132  | 46         | 54         |
| 20    | 24:90 28d  | 9545    | 4150   | 0.104  | 43         | 57         |
| 21    | 24:70 7d   | 26919   | 7522   | 0.199  | 86         | 14         |
| 22    | 24:70 14d  | 20847   | 6120   | 0.164  | 72         | 28         |
| 23    | 24:70 21d  | 14143   | 4922   | 0.136  | 75         | 25         |
| 24    | 24:70 28d  | 14217   | 4718   | 0.132  | 43         | 57         |

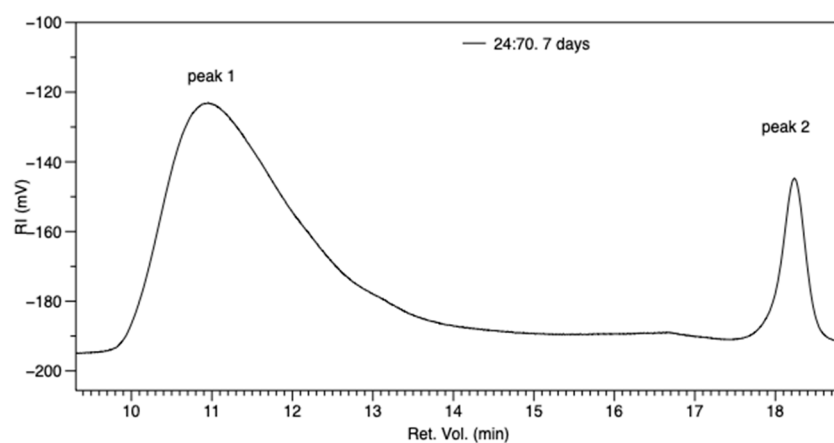**Figure S1.** Representative GPC chromatogram at RI detector showing peak 1 and peak 2.
